# Supplementary material for: Risk factors associated with prolonged viral clearance in patients with a refractory course of COVID-19: a retrospective study
Source: PeerJ. 2021 Nov 23;9:e12535. doi: 10.7717/peerj.12535 (PMC8621710; doi:10.7717/peerj.12535)
Supplement: Supplemental Information 2 [file peerj-09-12535-s002.xlsx]

## Sheet: Sheet1
Variables	Pt Number	Sex	Age	Age_group	CC_duration	Duration_of_viral_shedding	Hx_of_multi_hospital_tx	Readmission	SOB	Muscle_pain	Fever	Cough_sputum	Headache	Chills	Chest_tightness	Sore_throat	Nausea	Fatigue	Diarrhea	Dry_cough	Dyspnea	Dry_mouth	Palpitation	Chest_pain	Diagnosis	Hypertension	Diabetes_mellitus_II	Bulla	Hyperlipidemia	coronary_atherosclerotic_heart_disease	Kidney_cyst	Respiratory_failure_I	Hypothyroidism	Chronic_kidney_disease	Chronic_gastritis	COPD	Gouty_arthritis	DVT	Bradycardia	Cardiac_insufficiency	Fatty_liver	Lung_cancer	Gallstone	Hyperurecemia	Breast_cancer	Hepatitis_B	Aneurysm	Kidney_cancer	Thrombopenia
Full name					Duration of chief complaint (days)	Duration of viral shedding (days)	History of Multiple COVID-19-related hospitalization	Reasons of readmission	Shortness of breath	Muscle Pain	Fever	Cough sputum	Headache	Chills	Chest tightness	Sore throat	Nausea	Fatigue	Diarrhea	Dry cough	Dyspnea	Dry mouth	Palpitation	Chest pain	Diagnosis	Hypertension	Diabetes mellitus Type II	Bulla	Hyperlipidemia	coronary atherosclerotic heart disease	Kidney cyst	Respiratory failure type I	Hypothyroidism	Chronic kidney disease	Chronic gastritis	Chronic obstructive pulmonary disease	Gouty arthritis	Deep venous thrombosis	Bradycardia	Cardiac insufficiency	Fatty liver	Lung cancer	Gallstone	Hyperurecemia	Breast cancer	Hepatitis B	Aneurysm	Kidney cancer	Thrombopenia
Code		1=Male		1= ≤60 years old			0=No	0= No readmission	0= No	0= No	0= No	0= No	0= No	0= No	0= No	0= No	0= No	0= No	0= No	0= No	0= No	0= No	0= No	0= No	1=Mild	0= No	0= No	0= No	0= No	0= No	0= No	0= No	0= No	0= No	0= No	0= No	0= No	0= No	0= No	0= No	0= No	0= No	0= No	0= No	0= No	0= No	0= No	0= No	0= No
		2=Female		2= >60 years old			1=Yes	1= Recurrence of symptoms	1= Yes	1= Yes	1= Yes	1= Yes	1= Yes	1= Yes	1= Yes	1= Yes	1= Yes	1= Yes	1= Yes	1= Yes	1= Yes	1= Yes	1= Yes	1= Yes	2=General	1= Yes	1= Yes	1= Yes	1= Yes	1= Yes	1= Yes	1= Yes	1= Yes	1= Yes	1= Yes	1= Yes	1= Yes	1= Yes	1= Yes	1= Yes	1= Yes	1= Yes	1= Yes	1= Yes	1= Yes	1= Yes	1= Yes	1= Yes	1= Yes
								2= Possible reinfection with positive nucleic acid testing again																	3=Severe
								3= Referral with persistent symptoms																	4=Critical
[truncated: 34 more columns]
